# Supplementary material for: Structure of FlgK reveals the divergence of the bacterial Hook-Filament Junction of Campylobacter
Source: PubMed Central journal article supplement (PMC5691160; doi:10.1038/s41598-017-15837-0), 2017-11-16
Supplement: 41598_2017_15837_MOESM1_ESM.pdf [file 41598_2017_15837_MOESM1_ESM.pdf]

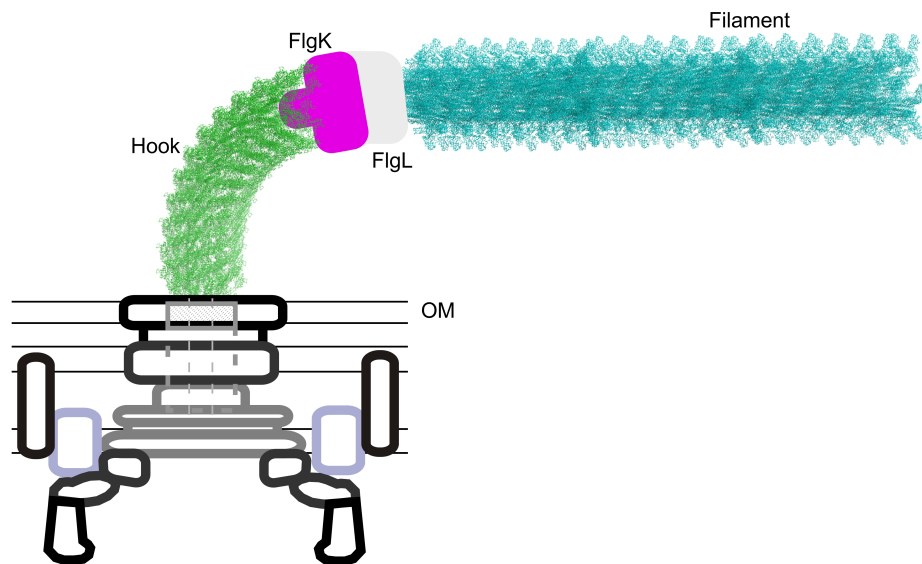

17

18 **Figure S1. Schematic view of the bacterial flagellum hook and filament showing the**

19 **Hook-filament junction.** View of the bacterial flagellum with a schematic representation of

20 the motor and the hook basal body. The hook (green) and the filament (cyan) are connected

21 by a junction consisting of two rings made of multiple copies of FlgK (purple) and FlgL

22 (grey).

23

24

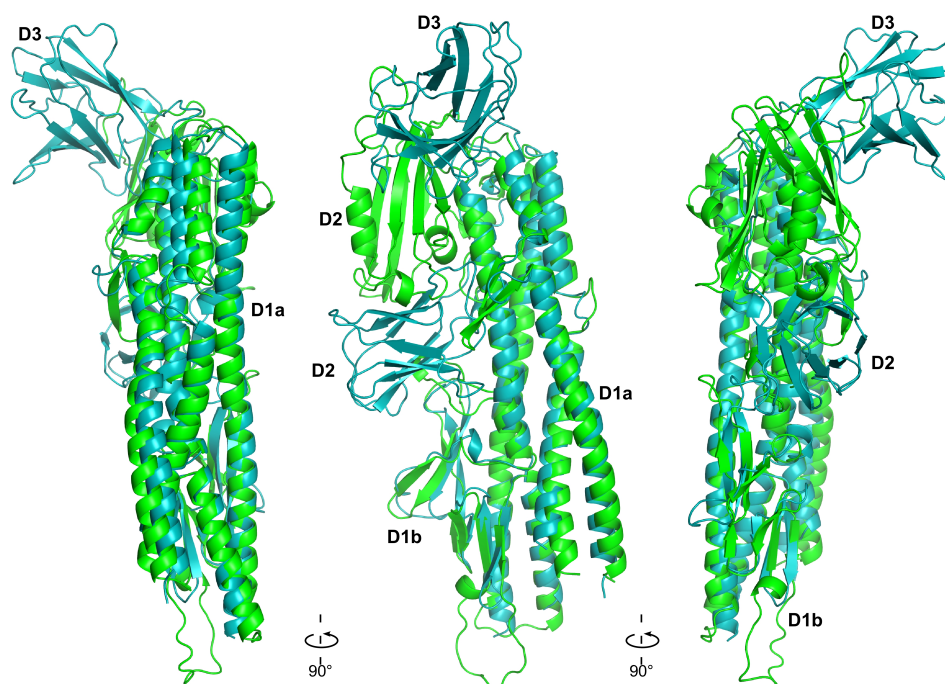

25

26 **Figure S2. Overall comparison of FlgK structures.** Views of the superposition of  
27 FlgKcj58 in green and FlgKbp64, in cyan. These structures superimpose with an RMSD of  
28 1.5 Å over 291 residues. These structures have 498 and 551 residues, respectively.  
29 Alignments were done with C-alpha Match<sup>39</sup>.

30

31

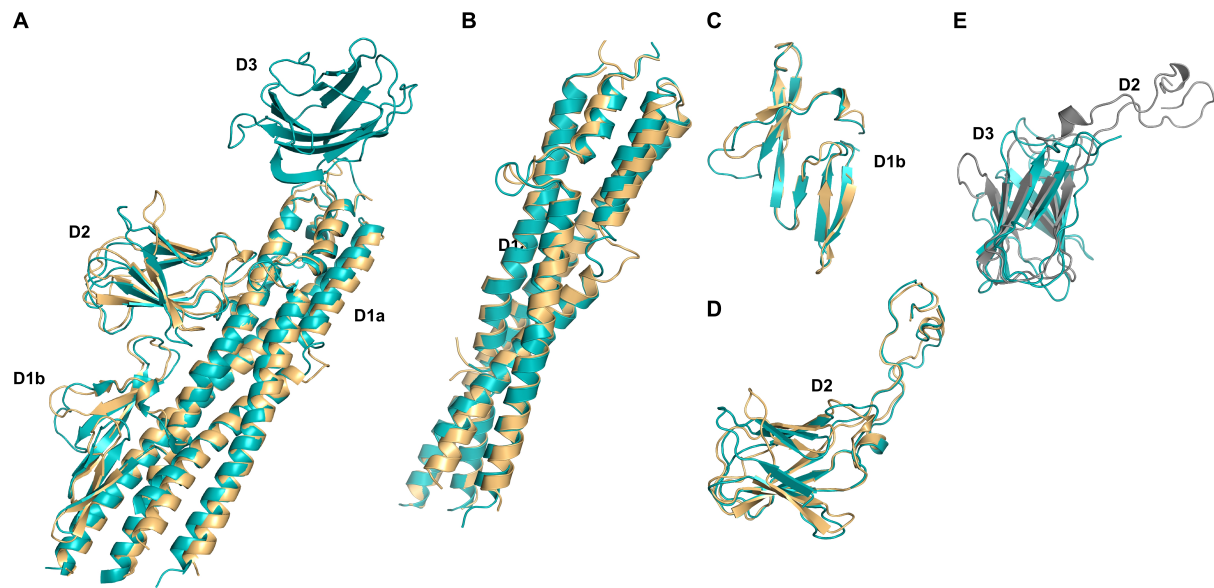

32

33 **Figure S3. Comparison of FlgKbp64 and FlgKse49.** Superposition of the different  
 34 domains of FlgKbp64 from *B. pseudomallei*, in cyan, and FlgKse49 from *S. enterica*, in gold.  
 35 (A) Overall superposition of FlgKbp64 and FlgKse49. (B) Domains D1a superimpose with  
 36 an RMSD of 1.1 Å over 229 residues. (C) Domains D1b superimpose with an RMSD of 1.1  
 37 Å over 63 residues. (D) Domains D2 superimpose with an RMSD of 1.3 Å over 107 residues.  
 38 (E) Domains D2 in grey and D3 in cyan, both from FlgKbp64, superimpose with an RMSD of  
 39 1.7 Å over 62 residues. Both domains have 123 and 124 residues, respectively. The  
 40 alignments were done with C-alpha Match<sup>39</sup>.

41

42

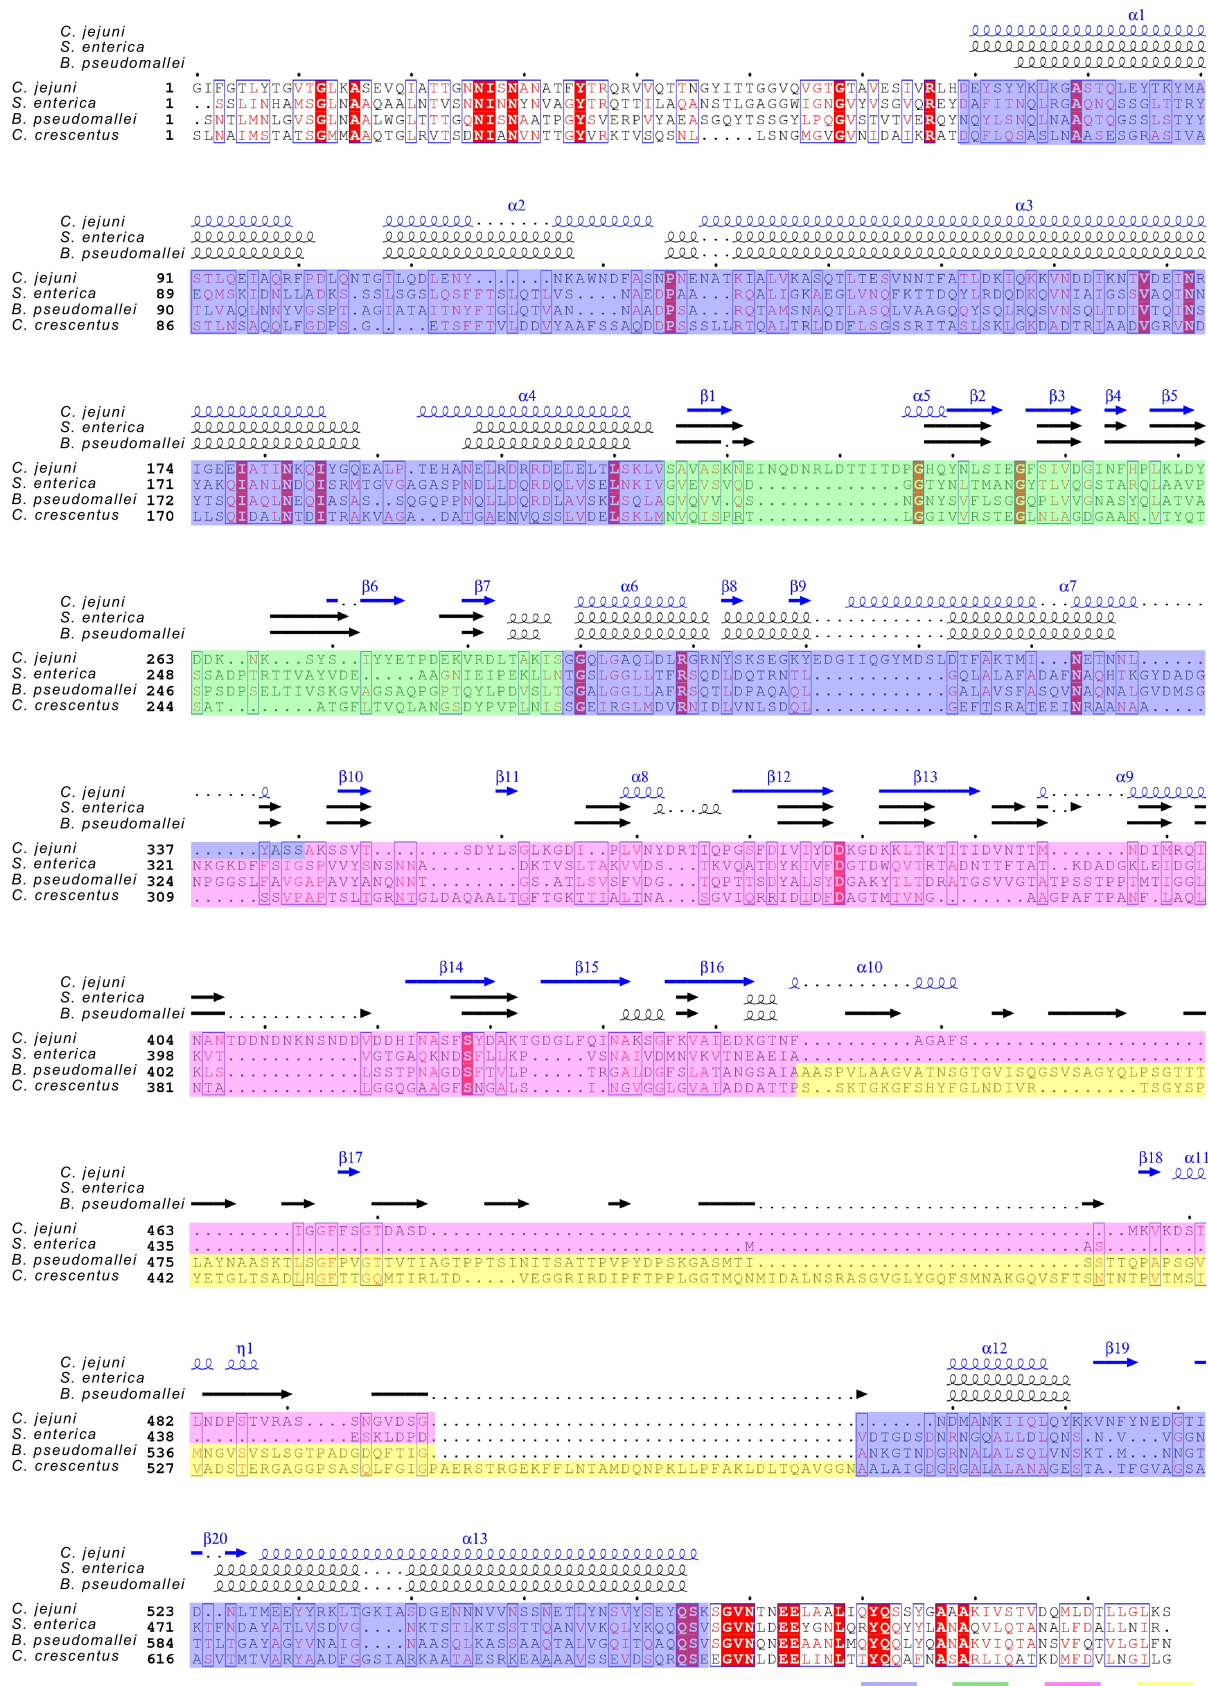

44 **Figure S4. Sequence alignment of FlgK proteins.** Sequence alignment of FlgK from C.  
45 jejuni, *S. enterica*, *B. pseudomallei* and *C. crescentus*. A representation of the secondary  
46 structures of the FlgKcj58 (blue), FlgKse49 and FlgKbp64 are also shown. The structure of  
47 domain D0 composed of the N-terminal and the C-terminal chains is not known. The  
48 different domains, D1a, D1b, D2 and D3, are colored in grey, blue, green, purple and yellow,  
49 respectively. Domain D3 is only found in FlgKbp and FlgKcc. Identical residues are written  
50 in white with a red square, while similar residue are written in white. Sequence identity  
51 between FlgKcc and FlgKcj, FlgKse and Flgkbp is 19.6%, 22.9% and 23.7%, while the  
52 sequence similarity is 32.8%, 36% and 36.9%, respectively. The alignment was done with  
53 Clustal Omega<sup>37</sup>, and secondary structure rendering was done with ESPript 3.0 (ref. 38).  
54
